# Supplementary material
Source: ML conference proceedings conference paper supplement (https://proceedings.mlr.press/v216/zhang23d.html)
Supplement: Supplementary file 1 [file zhang23d-supp.pdf]

---

# Graph Self-supervised Learning via Proximity Distribution Minimization (Supplementary Material)

---

Tianyi Zhang<sup>1</sup>

Zhenwei Dai<sup>2</sup>

Zhaozhuo Xu<sup>1</sup>

Anshumali Shrivastava<sup>1</sup>

<sup>1</sup>Department of Computer Science, Rice University, Houston, Texas, USA

<sup>2</sup>Amazon, Palo Alto, California, USA

## A TEST ACCURACY, TRAINING TIME, AND TRAINING DETAILS

The test accuracy of PDM with different proximity measures are presented in Table 1. The training time comparison of PDM with DGI Velickovic et al. [2019] is presented in Table 2. The training details and hyperparameters are shown in Table 3.

Table 1: Test accuracy of PDM with different proximity measures

|                   | Cora | Citeseer | PubMed |
|-------------------|------|----------|--------|
| PDM (heat kernel) | 84.4 | 74.3     | 83.6   |
| PDM (PPR)         | 84.1 | 74.6     | 83.8   |
| PDM (SimRank)     | 82.2 | 74.6     | 82.3   |

Table 2: Training Time Comparison between DGI and PDM

|     | Cora                     |                     |               | Citeseer                 |                     |               |
|-----|--------------------------|---------------------|---------------|--------------------------|---------------------|---------------|
|     | Total Training Time (ms) | Time Per Epoch (ms) | Test Accuracy | Total Training Time (ms) | Time Per Epoch (ms) | Test Accuracy |
| DGI | 2980                     | 14.9                | 82.3          | 4060                     | 20.3                | 71.8          |
| PDM | 7340                     | 36.7                | 84.4          | 10180                    | 50.9                | 74.6          |

Table 3: Training details and hyper-parameters for PDM on all datasets

|                | Cora                                | Citeseer | PubMed | ogbn-arxiv | ogbn-proteins | ogbn-products |
|----------------|-------------------------------------|----------|--------|------------|---------------|---------------|
| Architecture   | GCN                                 | GCN      | GCN    | GCN        | GCN           | GCN           |
| Depth          | 1                                   | 1        | 2      | 3          | 3             | 3             |
| Hidden Size    | 2048                                | 2048     | 32     | 2048       | 2048          | 1024          |
| Activation     | Leaky ReLU                          | tanh     | tanh   | Leaky ReLU | Leaky ReLU    | tanh          |
| Learning Rate  | 5e-3                                | 5e-4     | 1e-2   | 1e-4       | 1e-4          | 1e-4          |
| Diffusion Type | Heat                                | Heat     | PPR    | PPR        | PPR           | PPR           |
| Epochs         | 100                                 | 100      | 100    | 100        | 200           | 10            |
| Optimizer      | AdamW [Loshchilov and Hutter, 2019] |          |        |            |               |               |

## B COMPARISON WITH AUGMENTATION-FREE METHODS

We compare the performance of PDM with the augmentation-free method AFGRL [Lee et al., 2022], and the results are shown in Table 4. For AFGRL, we consider the best test accuracy for number of neighbors  $k \in \{4, 8, 16\}$ . PDM offers significant improvements over AFGRL, up to 5.1% on citeseer.

Table 4: Test Accuracy of AFGRL and PDM

|       | Cora | Citeseer | PubMed |
|-------|------|----------|--------|
| AFGRL | 81.1 | 69.5     | 79.2   |
| PDM   | 84.4 | 74.6     | 83.8   |

### References

- Namkyeong Lee, Junseok Lee, and Chanyoung Park. Augmentation-free self-supervised learning on graphs. In *Proceedings of the AAAI Conference on Artificial Intelligence*, volume 36, pages 7372–7380, 2022.
- Ilya Loshchilov and Frank Hutter. Decoupled weight decay regularization. In *International Conference on Learning Representations*, 2019. URL <https://openreview.net/forum?id=Bkg6RiCqY7>.
- Petar Velickovic, William Fedus, William L Hamilton, Pietro Liò, Yoshua Bengio, and R Devon Hjelm. Deep graph infomax. *ICLR (Poster)*, 2(3):4, 2019.
